# Supplementary material for: Analysis of histology and long noncoding RNAs involved in the rabbit hair follicle density using RNA sequencing
Source: PubMed Central journal article supplement (PMC7845105; doi:10.1186/s12864-021-07398-4), 2021-01-28
Supplement: 12864_2021_7398_MOESM1_ESM.pdf [file 12864_2021_7398_MOESM1_ESM.pdf]

**Table S1**

| Sample name          | H1                   | H2                   | H3                   | H4                   | L1                   | L2                   | L3                   | L4                   |
|----------------------|----------------------|----------------------|----------------------|----------------------|----------------------|----------------------|----------------------|----------------------|
| Mt_rRNA              | 89969<br>(0.24%)     | 83737<br>(0.25%)     | 123732<br>(0.21%)    | 69926<br>(0.20%)     | 165703<br>(0.35%)    | 74705<br>(0.20%)     | 120141<br>(0.29%)    | 110151<br>(0.21%)    |
| Mt_tRNA              | 1106<br>(0.00%)      | 1053<br>(0.00%)      | 1658<br>(0.00%)      | 1044<br>(0.00%)      | 1105<br>(0.00%)      | 1236<br>(0.00%)      | 1293<br>(0.00%)      | 1525<br>(0.00%)      |
| miRNA                | 712223<br>(1.94%)    | 448107<br>(1.36%)    | 977520<br>(1.64%)    | 620374<br>(1.81%)    | 551478<br>(1.18%)    | 607368<br>(1.62%)    | 776288<br>(1.85%)    | 719617<br>(1.37%)    |
| misc_RNA             | 1935579<br>(5.27%)   | 1421694<br>(4.32%)   | 2923012<br>(4.90%)   | 1976916<br>(5.77%)   | 1586504<br>(3.38%)   | 1990731<br>(5.32%)   | 2425073<br>(5.77%)   | 2226282<br>(4.23%)   |
| processed_pseudogene | 11623<br>(0.03%)     | 8135<br>(0.02%)      | 15002<br>(0.03%)     | 10862<br>(0.03%)     | 10739<br>(0.02%)     | 11710<br>(0.03%)     | 8804<br>(0.02%)      | 16152<br>(0.03%)     |
| protein_coding       | 19988707<br>(54.41%) | 17380601<br>(52.78%) | 32225864<br>(54.03%) | 19104245<br>(55.80%) | 21898377<br>(46.66%) | 19949272<br>(53.29%) | 22097640<br>(52.62%) | 28000150<br>(53.22%) |
| pseudogene           | 57976<br>(0.16%)     | 45782<br>(0.14%)     | 93306<br>(0.16%)     | 58613<br>(0.17%)     | 51988<br>(0.11%)     | 55890<br>(0.15%)     | 57386<br>(0.14%)     | 79773<br>(0.15%)     |
| rRNA                 | 1068<br>(0.00%)      | 1625<br>(0.00%)      | 16691<br>(0.03%)     | 6539<br>(0.02%)      | 8755<br>(0.02%)      | 2359<br>(0.01%)      | 2648<br>(0.01%)      | 17547<br>(0.03%)     |
| snRNA                | 1772<br>(0.00%)      | 1390<br>(0.00%)      | 2072<br>(0.00%)      | 1557<br>(0.00%)      | 1551<br>(0.00%)      | 1664<br>(0.00%)      | 2181<br>(0.01%)      | 1862<br>(0.00%)      |
| snoRNA               | 37758<br>(0.10%)     | 29449<br>(0.09%)     | 51142<br>(0.09%)     | 39036<br>(0.11%)     | 31187<br>(0.07%)     | 35716<br>(0.10%)     | 46008<br>(0.11%)     | 44765<br>(0.09%)     |
| Others               | 13900666<br>(37.84%) | 13511566<br>(41.03%) | 23213628<br>(38.92%) | 12349910<br>(36.07%) | 22626181<br>(48.21%) | 14706890<br>(39.28%) | 16461100<br>(39.19%) | 21397818<br>(40.67%) |
