# Supplementary material for: Analysis of histology and long noncoding RNAs involved in the rabbit hair follicle density using RNA sequencing
Source: PubMed Central journal article supplement (PMC7845105; doi:10.1186/s12864-021-07398-4), 2021-01-28
Supplement: 12864_2021_7398_MOESM5_ESM.pdf [file 12864_2021_7398_MOESM5_ESM.pdf]

**Table S5**

| Samples | Wool production (g) | Average wool production (g) |
|---------|---------------------|-----------------------------|
| H1      | 435.5               | 430.1                       |
| H2      | 449.3               |                             |
| H3      | 410.2               |                             |
| H4      | 425.4               |                             |
| L1      | 305.8               | 291.6                       |
| L2      | 298.0               |                             |
| L3      | 287.3               |                             |
| L4      | 275.2               |                             |
