# Supplementary material for: Analysis of histology and long noncoding RNAs involved in the rabbit hair follicle density using RNA sequencing
Source: PubMed Central journal article supplement (PMC7845105; doi:10.1186/s12864-021-07398-4), 2021-01-28
Supplement: 12864_2021_7398_MOESM6_ESM.pdf [file 12864_2021_7398_MOESM6_ESM.pdf]

**Table S6**

| Primer                    | Sequences of primers (5'→3') | Size (bp) |
|---------------------------|------------------------------|-----------|
| LNC_000797-F <sup>1</sup> | TGGTGGCCTGTGACTGAATC         | 152       |
| LNC_000797-R <sup>2</sup> | CGACAGAGCTGCAAACCCT          |           |
| LNC_013595-F              | TGTCTCCTCTGCCCTCACAA         | 144       |
| LNC_013595-R              | GCACAGGTGCTCAGATGCTA         |           |
| LNC_020367-F              | CAGCTGTGGCTCCAGTGCCT         | 59        |
| LNC_020367-R              | ACTGCGAGCAGCAGGGTTT          |           |
| KRTAP15-1-F               | TAGCCCCTGCCAGACAAATC         | 117       |
| KRTAP15-1-R               | CGGAAGAAGTTGGACCCACA         |           |
| TCHHL1-F                  | CCAAAAACCACCAGCACACG         | 117       |
| TCHHL1-R                  | TGGGGCTGAAGACTTCCTCC         |           |
| ALOX15B-F                 | AGGACGCCAGCCATTGAGTA         | 82        |
| ALOX15B-R                 | GGTTGAGGCCATTCAGGAAC         |           |
| GAPDH-F                   | AGGTCGGAGTGAACGGATTT         | 93        |
| GAPDH-R                   | GATCATTGATGGCGACAACA         |           |
